# Supplementary material for: Performance criteria for verbal autopsy-based systems to estimate national causes of death: development and application to the Indian Million Death Study
Source: PubMed Central journal article supplement (PMC3912490; doi:10.1186/1741-7015-12-21), 2014-02-04
Supplement: 1741-7015-12-21-S1.pdf [file 1741-7015-12-21-S1.pdf]

**SAMPLE REGISTRATION SYSTEM  
SRS - VERBAL AUTOPSY FORM  
Form 10A : Neonatal death (28 days or less of age)**

**CONFIDENTIAL**

|                                                                          |                                                                                         |
|--------------------------------------------------------------------------|-----------------------------------------------------------------------------------------|
| SRS unit number <input type="text"/>                                     | Unique form number <b>1</b> <input style="width:100px;" type="text" value="009958"/>    |
| Year: <b>20</b> <input style="width:20px;" type="text"/>                 | 1st HYS <input type="checkbox"/> 2nd HYS <input type="checkbox"/>                       |
| Name of head of the household <input style="width:300px;" type="text"/>  | Identification code of the head <input style="width:100px;" type="text"/>               |
| Full name of deceased <input style="width:300px;" type="text"/>          | Identification code of the deceased <input style="width:100px;" type="text"/>           |
| Name of mother of the deceased <input style="width:300px;" type="text"/> | Identification code of mother of the deceased <input style="width:100px;" type="text"/> |

**Section 1: Details for respondent and deceased**

**Details of respondent**

1. Name of respondent  Identification code of respondent

2. Relationship of respondent with deceased

|                                            |                                                     |
|--------------------------------------------|-----------------------------------------------------|
| <input type="checkbox"/> 1.                | <input type="checkbox"/> 7.                         |
| <input type="checkbox"/> 2. Brother/Sister | <input type="checkbox"/> 8.                         |
| <input type="checkbox"/> 3.                | <input type="checkbox"/> 9. Grandfather/Grandmother |
| <input type="checkbox"/> 4. Mother/Father  | <input type="checkbox"/> 10. Other relative         |
| <input type="checkbox"/> 5.                | <input type="checkbox"/> 11. Neighbour/No relation  |
| <input type="checkbox"/> 6.                |                                                     |

3. Did the respondent live with the deceased during the events that led to death?  
 1. Yes  2. No

4. Respondent's age in completed years

5. Respondent's sex  1. Male  2. Female

**Details of deceased**

6. Age in completed days

7. Sex  1. Male  2. Female

8. House address of the deceased (include PIN)

9. Date of death   /   /

10. Place of death?  
 1. Home  3. Other place  
 2. Health facility  9. Unknown

11. What did the respondent think this person die of?  
 (Allow the respondent to tell the illness in his or her own words)

**Section 2: Neonatal Death**

12A. Did s/he die from an injury or accident?  1. Yes  2. No → Skip to Q13  9. Unknown

12B. If yes, what kind of injury or accident?

|                                              |                                       |                                              |                                                          |
|----------------------------------------------|---------------------------------------|----------------------------------------------|----------------------------------------------------------|
| <input type="checkbox"/> 1. Traffic accident | <input type="checkbox"/> 4. Burns     | <input type="checkbox"/> 7. Bite/sting       | <input type="checkbox"/> 10. Others                      |
| <input type="checkbox"/> 2. Falls            | <input type="checkbox"/> 5. Drowning  | <input type="checkbox"/> 8. Natural disaster | <b>If child died of injury or accident → Skip to Q41</b> |
| <input type="checkbox"/> 3. Fall of objects  | <input type="checkbox"/> 6. Poisoning | <input type="checkbox"/> 9. Homicide/assault |                                                          |

**Details of pregnancy and delivery**

13. Was the child a single or multiple birth?  
 1. Single  2. Multiple  9. Unknown

14. Where was s/he born?  
 1. Home  3. Others  
 2. Health Facility  9. Unknown

15. Who attended the delivery?  
 1. Trained traditional birth attendant  
 2. Untrained traditional birth attendant  
 3. Midwife/Nurse  
 4. Allopathic Doctor  
 5. Ayurvedic/Homeopathic/Unani Doctor  
 6. None  7. Other  9. Unknown

16. How many months long was the pregnancy?

17A. Was there any complication during the pregnancy, or during labour?  
 1. Yes  2. No → Skip to Q18  9. Unknown

17B. If yes, what complications occurred? (Check all that apply)

|                                                                                       |
|---------------------------------------------------------------------------------------|
| <input type="checkbox"/> 1. Mother had fits                                           |
| <input type="checkbox"/> 2. Excessive bleeding before/during delivery                 |
| <input type="checkbox"/> 3. Waters broke one or more days before contractions started |
| <input type="checkbox"/> 4. Prolonged/difficult labour (12 hours or more)             |
| <input type="checkbox"/> 5. Operative delivery                                        |
| <input type="checkbox"/> 6. Mother had fever                                          |
| <input type="checkbox"/> 7. Baby delivered bottom or feet first                       |
| <input type="checkbox"/> 8. Baby had cord around neck                                 |
| <input type="checkbox"/> 9. Unknown                                                   |

18. Did the mother receive 2 doses of tetanus toxoid during pregnancy?  
 1. Yes  2. No  9. Unknown

**Details of baby after birth**

19. Was the baby born alive (alive if the baby ever cried, moved or breathed)?  
 1. Yes  2. No  9. Unknown

20. Were there any bruises or signs of injury on child's body after the birth?  
 1. Yes  2. No  9. Unknown

21. Did s/he have any visible malformations at birth (very small head, mass on spine, etc)?  
 1. Yes  2. No  9. Unknown

22. What was the child's size at birth?

|                                                |                                                 |
|------------------------------------------------|-------------------------------------------------|
| <input type="checkbox"/> 1. Very Small         | <input type="checkbox"/> 4. Larger than average |
| <input type="checkbox"/> 2. Smaller than usual | <input type="checkbox"/> 9. Unknown             |
| <input type="checkbox"/> 3. Average            |                                                 |

23A. Was s/he able to breath immediately after birth?  
 1. Yes  2. No → Skip to Q24A  9. Unknown

23B. If yes, did s/he stop being able to breath/cry?  
 1. Yes  2. No → Skip to Q24A  9. Unknown

23C. If yes, how long (days) after birth did s/he stop breathing/crying?

24A. Was s/he able to suckle normally during the first day of life?  
 1. Yes  2. No → Skip to Q25  9. Unknown

24B. If yes, did s/he stop being able to suck in a normal way?  
 1. Yes  2. No → Skip to Q25  9. Unknown

24C. If yes, how long (days) after birth did s/he stop sucking?



**SAMPLE REGISTRATION SYSTEM  
SRS - VERBAL AUTOPSY FORM  
Form 10B : Child death (29 days to 14 years)**

**CONFIDENTIAL**

|                                |                                  |                                               |                                |
|--------------------------------|----------------------------------|-----------------------------------------------|--------------------------------|
| SRS unit number                | <input type="text"/>             | Unique form number                            | <b>2 025980</b>                |
| Year : <b>20</b>               | 1st HYS <input type="checkbox"/> | 2nd HYS <input type="checkbox"/>              | Unit name <input type="text"/> |
| Name of head of the household  | <input type="text"/>             | Identification code of the head               | <input type="text"/>           |
| Full name of deceased          | <input type="text"/>             | Identification code of the deceased           | <input type="text"/>           |
| Name of mother of the deceased | <input type="text"/>             | Identification code of mother of the deceased | <input type="text"/>           |

**Section 1: Details for respondent and deceased**

**Details of respondent**

|                                                                                   |                                                                                                                                                                                                                                                                                                                                                                                                                                |                                   |                      |
|-----------------------------------------------------------------------------------|--------------------------------------------------------------------------------------------------------------------------------------------------------------------------------------------------------------------------------------------------------------------------------------------------------------------------------------------------------------------------------------------------------------------------------|-----------------------------------|----------------------|
| 1. Name of respondent                                                             | <input type="text"/>                                                                                                                                                                                                                                                                                                                                                                                                           | Identification code of respondent | <input type="text"/> |
| 2. Relationship of respondent with deceased                                       | <input type="checkbox"/> 1. <input type="checkbox"/> 7.<br><input type="checkbox"/> 2. Brother/Sister <input type="checkbox"/> 8.<br><input type="checkbox"/> 3. <input type="checkbox"/> 9. Grandfather/Grandmother<br><input type="checkbox"/> 4. Mother/Father <input type="checkbox"/> 10. Other relative<br><input type="checkbox"/> 5. <input type="checkbox"/> 11. Neighbour/No relation<br><input type="checkbox"/> 6. |                                   |                      |
| 3. Did the respondent live with the deceased during the events that led to death? | <input type="checkbox"/> 1. Yes <input type="checkbox"/> 2. No                                                                                                                                                                                                                                                                                                                                                                 |                                   |                      |
| 4. Respondent's age in completed years                                            | <input type="text"/>                                                                                                                                                                                                                                                                                                                                                                                                           |                                   |                      |
| 5. Respondent's sex                                                               | <input type="checkbox"/> 1. Male <input type="checkbox"/> 2. Female                                                                                                                                                                                                                                                                                                                                                            |                                   |                      |

**Details of deceased**

|                                                                            |                                                                                                                                                                                                                                                                                                                                                                                                                                                       |                                                                                                                                                             |
|----------------------------------------------------------------------------|-------------------------------------------------------------------------------------------------------------------------------------------------------------------------------------------------------------------------------------------------------------------------------------------------------------------------------------------------------------------------------------------------------------------------------------------------------|-------------------------------------------------------------------------------------------------------------------------------------------------------------|
| 6. (a) For < 1 year <input type="text"/> Months                            | 10. Date of death                                                                                                                                                                                                                                                                                                                                                                                                                                     | D D / M M / Y Y                                                                                                                                             |
| (b) For ≥ 1 year <input type="text"/> Completed years                      | 11. Place of death?                                                                                                                                                                                                                                                                                                                                                                                                                                   | <input type="checkbox"/> 1. Home <input type="checkbox"/> 3. Other place<br><input type="checkbox"/> 2. Health facility <input type="checkbox"/> 9. Unknown |
| 7. Sex <input type="checkbox"/> 1. Male <input type="checkbox"/> 2. Female | 12. What did the respondent think this person die of?<br>(Allow the respondent to tell the illness in his or her own words)                                                                                                                                                                                                                                                                                                                           | <input type="text"/>                                                                                                                                        |
| 8. Relationship of deceased to head of household                           | <input type="checkbox"/> 1. <input type="checkbox"/> 7.<br><input type="checkbox"/> 2. Brother/Sister <input type="checkbox"/> 8.<br><input type="checkbox"/> 3. Son/Daughter <input type="checkbox"/> 9.<br><input type="checkbox"/> 4. <input type="checkbox"/> 10. Other relative<br><input type="checkbox"/> 5. Grandchild <input type="checkbox"/> 11. Neighbour/No relation<br><input type="checkbox"/> 6. <input type="checkbox"/> 99. Unknown |                                                                                                                                                             |
| 9. House address of the deceased (Include PIN)                             | <input type="text"/>                                                                                                                                                                                                                                                                                                                                                                                                                                  |                                                                                                                                                             |

**Section 2: Child death**

|                                               |                                                                                                                                                                                                                                                                                                                                                                                                                                                                                                |
|-----------------------------------------------|------------------------------------------------------------------------------------------------------------------------------------------------------------------------------------------------------------------------------------------------------------------------------------------------------------------------------------------------------------------------------------------------------------------------------------------------------------------------------------------------|
| 13A. Did s/he die from an injury or accident? | <input type="checkbox"/> 1. Yes <input type="checkbox"/> 2. No → Skip to Q14 <input type="checkbox"/> 9. Unknown                                                                                                                                                                                                                                                                                                                                                                               |
| 13B. If yes, what kind of injury or accident? | <input type="checkbox"/> 1. Traffic accident <input type="checkbox"/> 4. Burns <input type="checkbox"/> 7. Bite/sting <input type="checkbox"/> 10. Suicide<br><input type="checkbox"/> 2. Falls <input type="checkbox"/> 5. Drowning <input type="checkbox"/> 8. Natural disaster <input type="checkbox"/> 11. Workplace<br><input type="checkbox"/> 3. Fall of objects <input type="checkbox"/> 6. Poisoning <input type="checkbox"/> 9. Homicide/assault <input type="checkbox"/> 12. Others |

If child died of injury or accident → Skip to Q33A

**Details of baby after birth**

|                                                                                                                                                                                                                     |                                                                                                                  |
|---------------------------------------------------------------------------------------------------------------------------------------------------------------------------------------------------------------------|------------------------------------------------------------------------------------------------------------------|
| 14. How was the child's size at birth?                                                                                                                                                                              | 15B. If yes, after how many months of pregnancy?                                                                 |
| <input type="checkbox"/> 1. Very Small <input type="checkbox"/> 4. Larger than average<br><input type="checkbox"/> 2. Smaller than usual <input type="checkbox"/> 9. Unknown<br><input type="checkbox"/> 3. Average | <input type="text"/>                                                                                             |
| 15A. Was s/he born premature?                                                                                                                                                                                       | 16A. Was the child breast-fed?                                                                                   |
| <input type="checkbox"/> 1. Yes <input type="checkbox"/> 2. No → Skip to Q16A <input type="checkbox"/> 9. Unknown                                                                                                   | <input type="checkbox"/> 1. Yes <input type="checkbox"/> 2. No → Skip to Q17 <input type="checkbox"/> 9. Unknown |
|                                                                                                                                                                                                                     | 16B. If yes, did the child stop feeding during the illness that led to death?                                    |
|                                                                                                                                                                                                                     | <input type="checkbox"/> 1. Yes <input type="checkbox"/> 2. No <input type="checkbox"/> 9. Unknown               |

**Details of sickness**

|                                                                                                                  |                                                                                                                                                      |
|------------------------------------------------------------------------------------------------------------------|------------------------------------------------------------------------------------------------------------------------------------------------------|
| 17. How many days was s/he sick before death?                                                                    | 23A. Did s/he have diarrhoea (more frequent or more liquid stools)?                                                                                  |
| <input type="text"/>                                                                                             | <input type="checkbox"/> 1. Yes <input type="checkbox"/> 2. No → Skip to Q24A <input type="checkbox"/> 9. Unknown                                    |
| 18A. Did s/he have fever?                                                                                        | 23B. If yes, for how many days?                                                                                                                      |
| <input type="checkbox"/> 1. Yes <input type="checkbox"/> 2. No → Skip to Q19 <input type="checkbox"/> 9. Unknown | <input type="text"/>                                                                                                                                 |
| 18B. If yes, how many days did the fever last?                                                                   | 23C. Was there visible blood in the stools?                                                                                                          |
| <input type="text"/>                                                                                             | <input type="checkbox"/> 1. Yes <input type="checkbox"/> 2. No <input type="checkbox"/> 9. Unknown                                                   |
| 18C. Was the fever accompanied by chills/rigors?                                                                 | 23D. If s/he had diarrhoea, was s/he given any fluids such as (local term for oral rehydration treatment)?                                           |
| <input type="checkbox"/> 1. Yes <input type="checkbox"/> 2. No <input type="checkbox"/> 9. Unknown               | <input type="checkbox"/> 1. Yes <input type="checkbox"/> 2. No <input type="checkbox"/> 9. Unknown                                                   |
| 19. Did s/he have convulsions or fits?                                                                           | 24A. Did s/he have a cough?                                                                                                                          |
| <input type="checkbox"/> 1. Yes <input type="checkbox"/> 2. No <input type="checkbox"/> 9. Unknown               | <input type="checkbox"/> 1. Yes <input type="checkbox"/> 2. No → Skip to Q25A <input type="checkbox"/> 9. Unknown                                    |
| 20. Was s/he unconscious during the illness that led to death?                                                   | 24B. If yes, how many days?                                                                                                                          |
| <input type="checkbox"/> 1. Yes <input type="checkbox"/> 2. No <input type="checkbox"/> 9. Unknown               | <input type="text"/>                                                                                                                                 |
| 21. Did s/he develop stiffness of the whole body?                                                                | 24C. Was it...?                                                                                                                                      |
| <input type="checkbox"/> 1. Yes <input type="checkbox"/> 2. No <input type="checkbox"/> 9. Unknown               | <input type="checkbox"/> 1. Dry <input type="checkbox"/> 3. With blood<br><input type="checkbox"/> 2. Productive <input type="checkbox"/> 9. Unknown |
| 22. Did s/he have a stiff neck? (demonstrate)                                                                    | 25A. Did s/he have breathing difficulties?                                                                                                           |
| <input type="checkbox"/> 1. Yes <input type="checkbox"/> 2. No <input type="checkbox"/> 9. Unknown               | <input type="checkbox"/> 1. Yes <input type="checkbox"/> 2. No → Skip to Q26A <input type="checkbox"/> 9. Unknown                                    |



**SAMPLE REGISTRATION SYSTEM  
SRS - VERBAL AUTOPSY FORM  
Form 10C : Adult death (15 years or older)**

**CONFIDENTIAL**

SR\$ unit number   
Year : **20**  1st HYS  2nd HYS

Unique form number **3 05608A**  
Unit name

Name of head of the household  Identification code of the head   
Full name of deceased  Identification code of the deceased

**Section 1: Details for respondent and deceased**

**Details of respondent**

1. Name of respondent  Identification code of respondent   
2. Relationship of respondent with deceased  
 1. Wife/Husband  7. Brother in law/Sister in law  
 2. Brother/Sister  8. Parent in law  
 3. Son/Daughter  9. Grandfather/Grandmother  
 4. Mother/Father  10. Other relative  
 5. Grandchild  11. Neighbour/No relation  
 6. Son in law/Daughter in law  
 3. Did the respondent live with the deceased during the events that led to death?  
 1. Yes  2. No  
 4. Respondent's age in completed years   
 5. Respondent's sex  1. Male  2. Female

**Details of deceased**

6. Age in years   
7. Sex  1. Male  2. Female  
8A. For work does s/he have to live away from home?  
 1. Yes  2. No  9. Unknown  
8B. If yes, how many months a year?  
 1. Less than one month  3. More than three months  
 2. One to three months  
9. Relationship of deceased to head of household  
 1. Wife/Husband  8. Parent in law  
 2. Brother/Sister  9. Grandfather/Grandmother  
 3. Son/Daughter  10. Other relative  
 4. Mother/Father  11. Neighbour/No relation  
 5. Grandchild  12. Self  
 6. Son in law/Daughter in law  99. Unknown  
 7. Brother in law/Sister in law  
 10. House address of the deceased (include PIN)  
  
  
  
 11. How many years did the deceased live at the address?   
 12. Date of death  /  /   
 13. Place of death?  
 1. Home  3. Other place  
 2. Health facility  9. Unknown  
 14. What did the respondent think this person die of?  
 (Allow the respondent to tell the illness in his or her own words)

**Section 2: Past History**

Had a doctor **EVER** stated that the deceased had the following diseases?

|                                                  | Yes                      | No                       | Unknown                  |
|--------------------------------------------------|--------------------------|--------------------------|--------------------------|
| 15. Hypertension                                 | <input type="checkbox"/> | <input type="checkbox"/> | <input type="checkbox"/> |
| 16. Heart disease                                | <input type="checkbox"/> | <input type="checkbox"/> | <input type="checkbox"/> |
| 17. Stroke                                       | <input type="checkbox"/> | <input type="checkbox"/> | <input type="checkbox"/> |
| 18. Diabetes                                     | <input type="checkbox"/> | <input type="checkbox"/> | <input type="checkbox"/> |
| 19. Tuberculosis                                 | <input type="checkbox"/> | <input type="checkbox"/> | <input type="checkbox"/> |
| 20. HIV/AIDS                                     | <input type="checkbox"/> | <input type="checkbox"/> | <input type="checkbox"/> |
| 21. Cancer (write site in narrative)             | <input type="checkbox"/> | <input type="checkbox"/> | <input type="checkbox"/> |
| 22. Asthma                                       | <input type="checkbox"/> | <input type="checkbox"/> | <input type="checkbox"/> |
| 23. Other chronic illness (specify in narrative) | <input type="checkbox"/> | <input type="checkbox"/> | <input type="checkbox"/> |

24. During the last year, did the weight of the deceased change significantly?  
 1. About same  3. Yes, lost significantly (lost 2.5 Kg or more)  
 2. Yes, gained significantly (gained 2.5 Kg or more)  9. Unknown

25A. Was the deceased taking any medications regularly during the last five years?  
 1. Yes  2. No  9. Unknown

25B. If yes, write names of upto three medicines. (In Hindi or English only)

|                      |
|----------------------|
| <input type="text"/> |
| <input type="text"/> |
| <input type="text"/> |
