# Supplementary material for: Performance criteria for verbal autopsy-based systems to estimate national causes of death: development and application to the Indian Million Death Study
Source: PubMed Central journal article supplement (PMC3912490; doi:10.1186/1741-7015-12-21), 2014-02-04
Supplement: 1741-7015-12-21-S2.pdf [file 1741-7015-12-21-S2.pdf]

## Additional file 2a – Screenshots of physician training e-learning modules

The screenshot shows a Mozilla Firefox browser window displaying the MDS Physician Training Phase 1 e-learning module. The browser address bar shows the URL: [cghr.org:8080/cme2-training-old/training/training/mds\\_training\\_ver\\_12/player.html](http://cghr.org:8080/cme2-training-old/training/training/mds_training_ver_12/player.html). The page title is "MDS Physician Training: Phase 1 (00:15 / 53:28)". The main content area features the Centre for Global Health Research (cghr) logo and the title "MDS Physician Training". Below the title is a photograph of a doctor in a white coat holding a clipboard, standing next to a woman wearing a pink headscarf. The left sidebar contains a "Table of Contents" with the following items: Home, Help, Menu, Important!, RHIME, ICD-10, Cardinal Symptoms, Tutorial: Cause of Death, Six: Steps, Remember!, and Coding Exam. The bottom of the slide shows a media player interface with "SLIDE 1 OF 39", "PLAYING", and a timer at "00:15 / 00:47".

The screenshot shows the same Mozilla Firefox browser window, now displaying a quiz question. The browser address bar shows the URL: [cghr.org:8080/cme2-training-old/training/training/mds\\_training\\_ver\\_12/player.html](http://cghr.org:8080/cme2-training-old/training/training/mds_training_ver_12/player.html). The page title is "MDS Physician Training: Phase 1 (26:47 / 53:28)". The main content area is a red box containing the following text:

Question 4 of 5 Point Value: 10

42-year old Bahadur was brought to the hospital emergency department with an infected wound on his right foot. Because of repeated convulsions he was admitted to the hospital. He could not open his mouth, could not swallow anything and there was stiffness of his neck and body. He was also sweating a lot. His wife reported that while working in the fields 10 days back, he had stepped on a nail. He treated the injury by himself. The patient died of repeated convulsions on the second day after admission in the hospital.

The correct underlying cause of death is:

- a) Stepping on a nail
- b) Convulsions
- c) Tetanus
- d) Infection

Key words you might include are: nail penetrating skin of foot, infected wound, convulsions, difficulty opening mouth, stiffness of neck and body.

Score so far: 10 points out of 30 SUBMIT

The left sidebar contains a "Table of Contents" with the following items: Home, Help, Menu, Important!, RHIME, ICD-10, Cardinal Symptoms (Adult, Child, Neonate), Tutorial: Cause of Death (Part-1, CoD 1, CoD 2, Part 2 – Risk Factors vs UCoD, Common Examples 1, Common Examples 2, A Note of Caution, Part 3 - Examples & Quiz, Example 2, Example 3, Test Yourself), Quiz, Tutorial Recap, Six: Steps (Sample Narrative, 1 – READ RECORD, ? – KEY WORDS). The bottom of the slide shows a media player interface with "SLIDE 24 OF 39", "PLAYING", and a timer at "00:00 /".

## Additional file 2b – Screenshots of verbal autopsy surveyors' e-learning modules

Verbal Autopsy Training | Million Death Study - Mozilla Firefox

File Edit View History Bookmarks Tools Help

Verbal Autopsy Training | Million Death Study

vatraining.vvm-host.net

Google

# Verbal Autopsy Training

**Million Death Study**

**Introduction**

This Verbal Autopsy training tool is developed in order to aid the training process of Verbal Autopsy field surveyors. The animation below explains the concept of Verbal Autopsy and demonstrate how to use this training module.

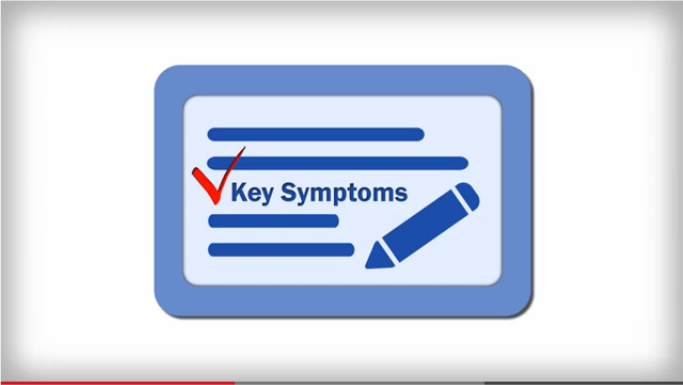

**Background information**

Verbal autopsy is an investigation of the chain of events, circumstances, and signs and symptoms of illness leading to death through an interview of relatives or associates of the

**Introduction**

- Cardinal Symptoms
- Cardinal Symptoms List for Adult Deaths
- Cardinal Symptoms List for Child & Neonatal Deaths
- 5 Interview Steps
- Interview Tips
- Live Interview Videos
- Narrative Case 1
- Narrative Case 2
- Narrative Case 3
- Narrative Case 4
- Narrative Case 5
- Summary
- Resources

OFFICE OF THE REGISTRAR GENERAL, INDIA

Live Interview Videos | Verbal Autopsy Training - Mozilla Firefox

File Edit View History Bookmarks Tools Help

Live Interview Videos | Verbal Autopsy Traini...

vatraining.vvm-host.net/live-interview-videos/

Google

# Verbal Autopsy Training

**Million Death Study**

**Interview 01: Death of 70 years old male, daughter interviewed**



Click to see expert's review

**Interview 02: Death of 60-70 years old male, daughter interviewed**



**Introduction**

- Cardinal Symptoms
- Cardinal Symptoms List for Adult Deaths
- Cardinal Symptoms List for Child & Neonatal Deaths
- 5 Interview Steps
- Interview Tips
- Live Interview Videos**
- Narrative Case 1
- Narrative Case 2
- Narrative Case 3
- Narrative Case 4
- Narrative Case 5
- Summary
- Resources

OFFICE OF THE REGISTRAR GENERAL, INDIA
