# Supplementary material for: Performance criteria for verbal autopsy-based systems to estimate national causes of death: development and application to the Indian Million Death Study
Source: PubMed Central journal article supplement (PMC3912490; doi:10.1186/1741-7015-12-21), 2014-02-04
Supplement: 1741-7015-12-21-S4.pdf [file 1741-7015-12-21-S4.pdf]

## Additional file 4: Mapping of India MDS cause of death categories to GBD 2010 and WHO-VA 2012

| Causes of death                                                            | MDS                                           | WHO-VA 2012                                   | GBD 2010                                                              |
|----------------------------------------------------------------------------|-----------------------------------------------|-----------------------------------------------|-----------------------------------------------------------------------|
| <b>Neonates (ages 0-28 days)</b>                                           |                                               |                                               |                                                                       |
| Prematurity & low birth weight                                             | 1C01                                          | 10.01                                         | A.05.01                                                               |
| Birth asphyxia & birth trauma                                              | 1C02                                          | 10.02                                         | A.05.02                                                               |
| Neonatal Infections                                                        | 1A                                            | 10.03, 10.04                                  | A.05.03                                                               |
| All other causes                                                           | 1B,1D,2A-3A                                   | 10.05-10.06                                   | A.05.04                                                               |
| Ill-defined conditions                                                     | 4A                                            | 10.99                                         | -                                                                     |
| <b>Under 5 (ages 1-59 months)</b>                                          |                                               |                                               |                                                                       |
| Pneumonia                                                                  | 1A01                                          | 10.02, 10.03                                  | A.02.03 TO A.02.05                                                    |
| Diarrhoeal diseases                                                        | 1B01                                          | 10.04                                         | A.02.01, A.02.02                                                      |
| Malaria                                                                    | 1B07                                          | 10.05                                         | A.03.01                                                               |
| Other infections and parasitic diseases                                    | 1A (except 1A01), 1B (except 1B01, 1B07,1B09) | 01.01, 01.03, 01.06-01.99, 10.04-10.05        | A.01, A02 (Except A02.01-A02.05), A03 (except A.03.01), A05,A07       |
| injuries                                                                   | 3A                                            | 12.01-12.99                                   | C.01 TO C.04                                                          |
| All other causes                                                           | 1C, 1D, 2A                                    | 02.01-08.01, 10.01-10.03, 10.06-10.99, 98     | A05,A06,B.01 to B.10                                                  |
| Ill-defined conditions                                                     | 1B09, 4A                                      | 99                                            | -                                                                     |
| <b>Adults (ages 5-69 years)</b>                                            |                                               |                                               |                                                                       |
| <b>Infections, parasitic diseases, maternal and nutritional conditions</b> |                                               |                                               |                                                                       |
| Malaria                                                                    | 1H                                            | 01.05                                         | A.03.01                                                               |
| Tuberculosis                                                               | 1A                                            | 01.09                                         | A.01.01                                                               |
| HIV/STI                                                                    | 1B,1C                                         | 01.03                                         | A.01.02, A.07.01                                                      |
| Other infectious diseases                                                  | 1A to 1L (exclude 1A to 1C, 1H)               | 01.01-01.02, 01.04, 01.06, 01.08, 01.10-01.99 | A.01 to A.03 (exclude A.01.01, A.01.02, A.03.01) A.07(excl. A.07.01 ) |
| Maternal conditions                                                        | 1M                                            | 09.01-09.99                                   | A.04                                                                  |
| Nutritional conditions                                                     | 1O                                            | 03.01,03.02                                   | A.06                                                                  |
| <b>Chronic conditions</b>                                                  |                                               |                                               |                                                                       |
| Cancer                                                                     | 2A                                            | 02.01-02.99                                   | B.01                                                                  |
| Heart disease                                                              | 2G03                                          | 04.01                                         | B.02.02                                                               |
| Stroke                                                                     | 2G04                                          | 04.02                                         | B.02.03                                                               |
| Other CVD                                                                  | 2G (exclude 2G03,2G04)                        | 04.03-04.04                                   | B.02 (exclude B.02.02, B02.03 )                                       |
| Chronic respiratory diseases                                               | 2H                                            | 05.01-05.02                                   | B.03                                                                  |
| Cirrhosis of the liver                                                     | 2J02                                          | 06.02                                         | B.04                                                                  |
| Other digestive diseases                                                   | 2J (except 2J02)                              | 06.01                                         | B.05                                                                  |
| Renal and other endocrine diseases                                         | 2B,2C,2K01                                    | 03.03, 07.01                                  | B.08                                                                  |
| Other chronic diseases                                                     | 2D, 2F, 2K02 to 2L                            | 07.01-09.99, 10.06, 98                        | B.06 to B10                                                           |
| <b>Injuries</b>                                                            |                                               |                                               |                                                                       |
| Road traffic accidents                                                     | 3A01                                          | 12.01                                         | C.01.01                                                               |
| Suicides                                                                   | 3B01                                          | 12.08                                         | C.03.01                                                               |
| Other injuries                                                             | 3A (except 3A01),3B (except 3B01), 3C         | 12.02-12.07, 12.09-12.99                      | C.01 (except C.01.01), C.02, C.03 (except, C.03.01), C.04             |
| <b>Ill-Defined conditions</b>                                              |                                               |                                               |                                                                       |
| Ill-defined conditions                                                     | 1P, 4A                                        | 99                                            | Redistributed*                                                        |

### Notes:

\*In GBD, ill-defined conditions are removed from each disease category and redistributed among other diseases [27]. This table does not show redistributed deaths.
